# Supplementary material for: Annotation and Molecular Characterisation of the TaIRO3 and TaHRZ Iron Homeostasis Genes in Bread Wheat (Triticum aestivum L.)
Source: MDPI journal article supplement (doi:10.3390/genes12050653), 2021-04-27
Supplement: s1 [file s1]

## Supplementary Materials

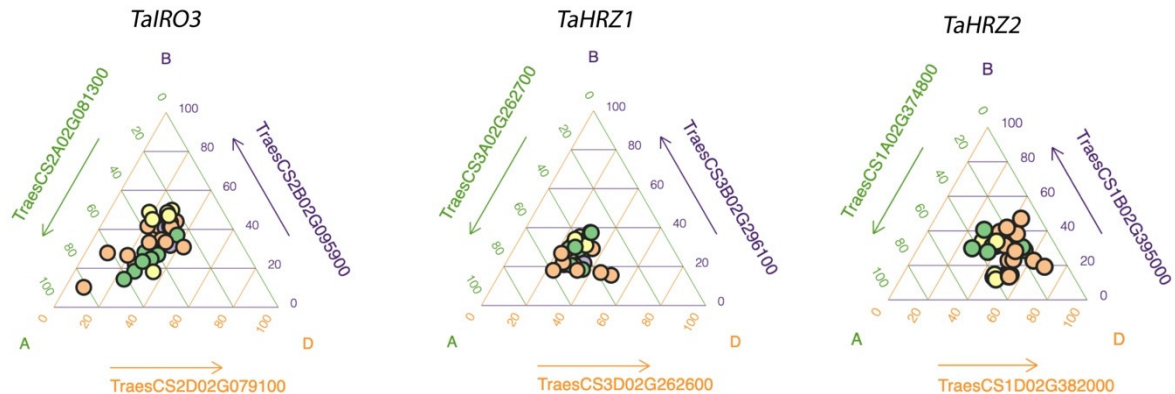

**Supplementary Figure 1** Ternary plots showing expression levels of *TaIRO3*, *TaHRZ1*, and *TaHRZ2* genes from subgenomes A (green), B (purple), and D (orange) as extracted from the Wheat Expression Browser database (wheat-expression.com). TraesIDs of each *TaIRO3*, *TaHRZ1*, and *TaHRZ2* homoeolog is provided alongside each ternary plot.

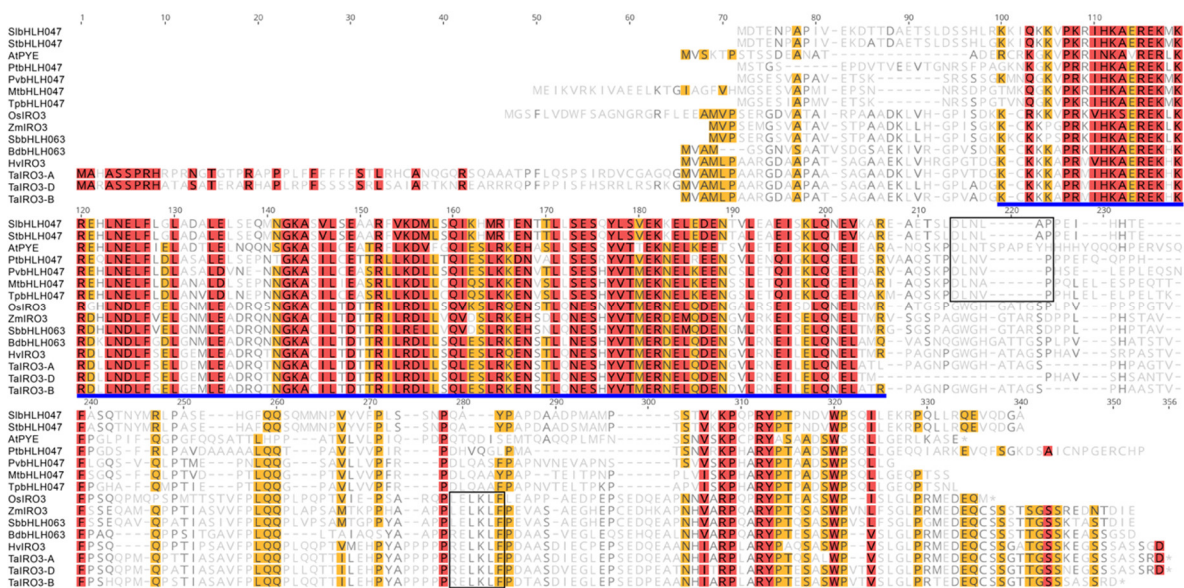

**Supplementary Figure 2** Conserved amino acid sequences of IRO3/PYE proteins. Red shading represents 100% similarity. Orange shading represents 80-100% shading. Black numbers represent 60-80% similarity. Grey numbers represent less than 60% similarity. The Helix-Loop-Helix domain (dark blue) and a conserved region of unknown function (light blue) are underlined. Boxes highlight locations containing EAR motifs. *Arabidopsis thaliana* (At), *Brachypodium distachyon* (Bd), *Hordeum vulgare* L. (Hv), *Medicago truncatula* (Mt), *Oryza sativa* L. (Os), *Phaseolus vulgaris* L. (Pv), *Populus trichocarpa* (Pt), *Solanum lycopersicum* L. (Sl), *Solanum tuberosum* L. (St), *Sorghum bicolor* L. (Sb), *Trifolium pratense* L. (Tp), *Triticum aestivum* L. (Ta) and *Zea mays* L. (Zm).



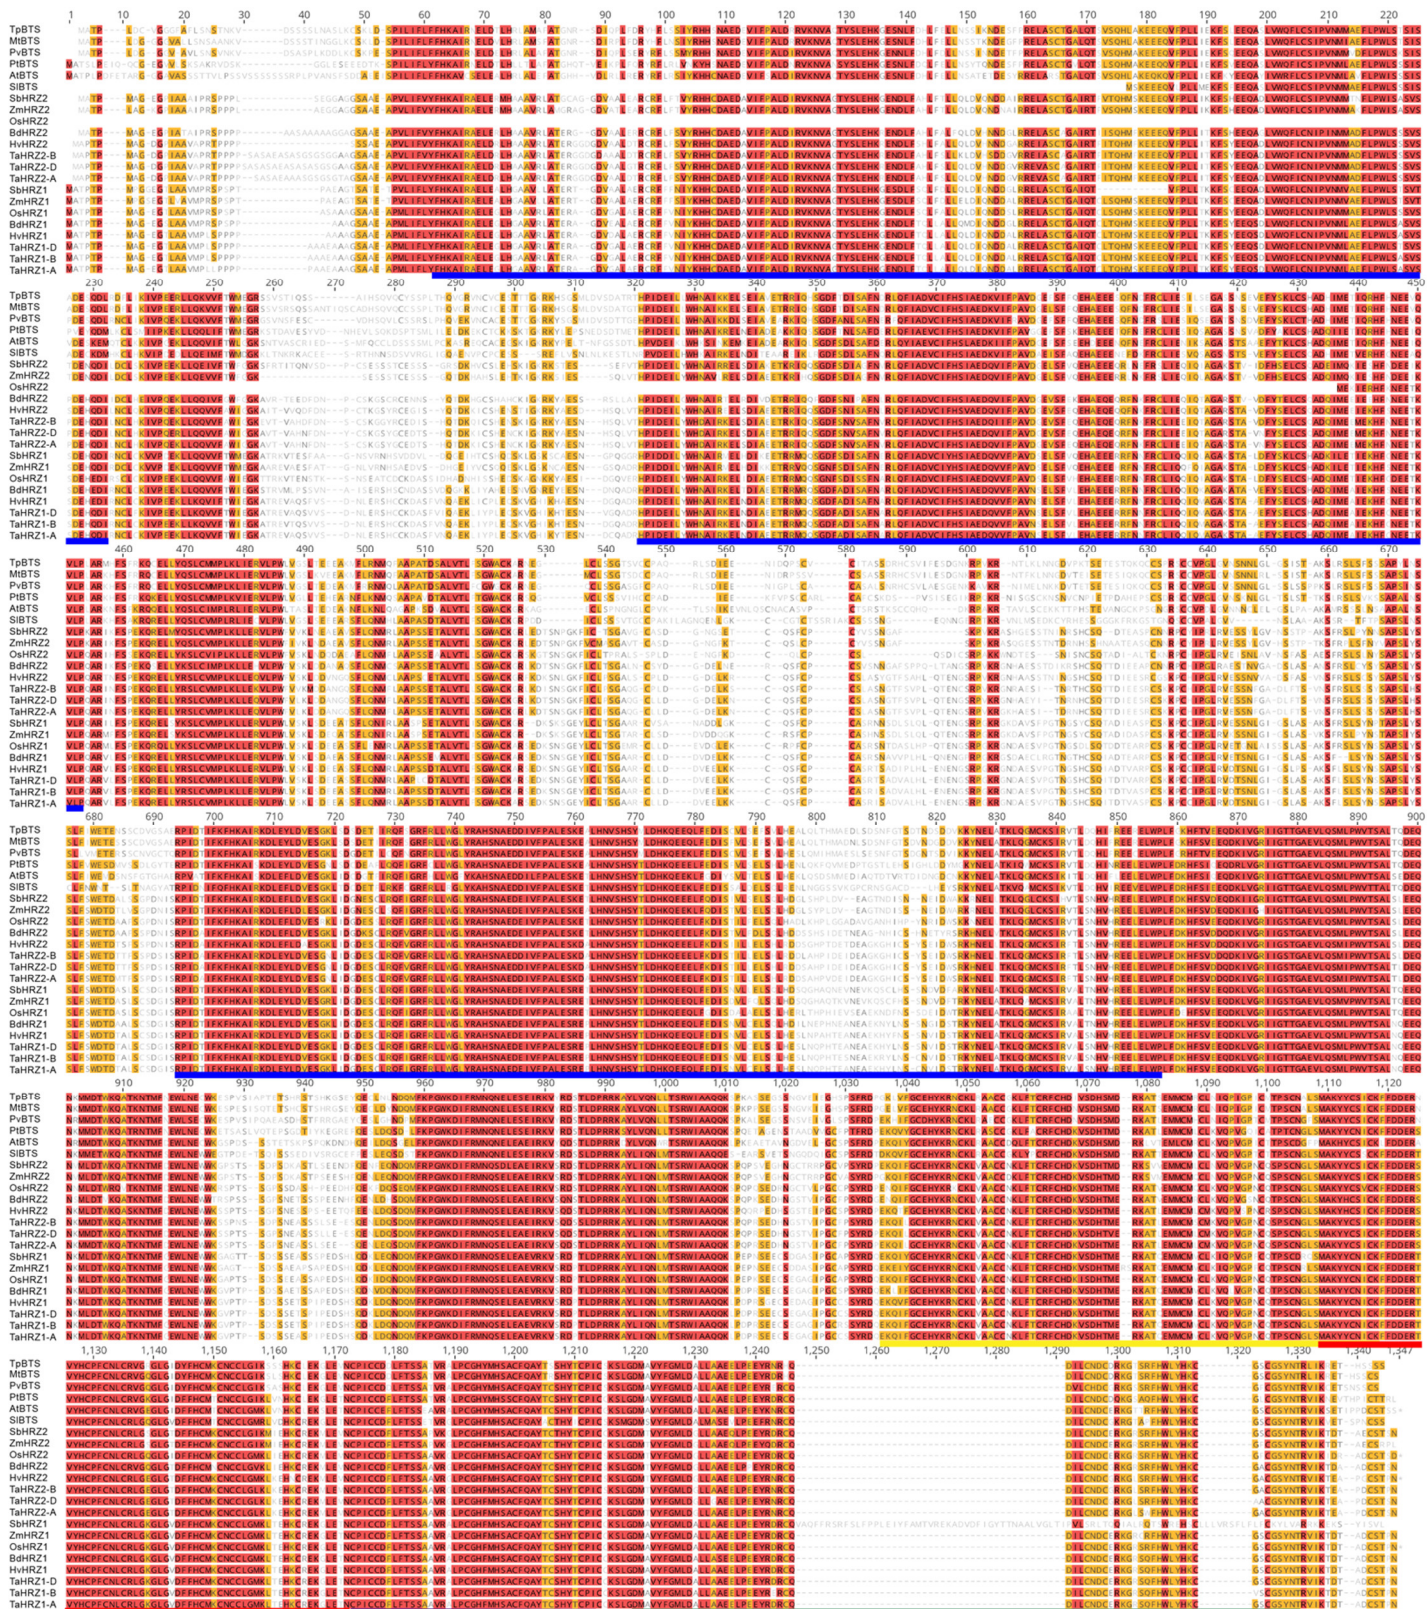

**Supplementary Figure 3** Conserved amino acid sequences of HRZ1 and HRZ2 proteins. Red shading represents 100% similarity. Orange shading represents 80-100% shading. Black numbers represent 60-80% similarity. Grey numbers represent less than 60% similarity. The hemerythrin (blue), Znf CHY (yellow), Znf CTCHY (red), Znf RING (purple) and RCHY1 zinc-ribbon (green) domains are underlined *Arabidopsis thaliana* (At), *Brachypodium distachyon* (Bd), *Hordeum vulgare* L. (Hv), *Medicago truncatula* (Mt), *Oryza sativa* L. (Os), *Phaseolus vulgaris* L. (Pv), *Populus trichocarpa* (Pt), *Solanum lycopersicum* L. (Sl), *Sorghum bicolor* L. (Sb), *Trifolium pratense* L. (Tp), *Triticum aestivum* L. (Ta) and *Zea mays* L. (Zm).



**Supplementary Table 1** Characteristics of *TaIRO3* and *TaHRZ* genes and *in silico* characterisation of TaIRO3 and TaHRZ proteins.

| Gene            | No. of splice variants | ID<br>(Ensembl plants) | Molecular weight<br>(Da) | No. of AA | Gravy score | Theoretical pI | Predicted Subcellular Localisation     |
|-----------------|------------------------|------------------------|--------------------------|-----------|-------------|----------------|----------------------------------------|
| <i>TaIRO3-A</i> | 2                      | TraesCS2A02G081300.1   | 36657.12                 | 338       | -0.601      | 6.13           | 0.933 (Nucleus)                        |
| <i>TaIRO3-B</i> | 1                      | TraesCS2B02G095900.1   | 29334.81                 | 270       | -0.642      | 5.33           | 0.9101 (Nucleus)                       |
| <i>TaIRO3-D</i> | 1                      | TraesCS2D02G079100.1   | 36238.83                 | 329       | -0.699      | 8.99           | 0.8146 (Nucleus)                       |
| <i>TaHRZ1-A</i> | 11                     | TraesCS3A02G262700.5   | 139307.38                | 1237      | -0.335      | 5.52           | 0.4959 (Nucleus)<br>0.4316 (Cytoplasm) |
| <i>TaHRZ1-B</i> | 15                     | TraesCS3B02G296100.7   | 139387.4                 | 1237      | -0.349      | 5.57           | 0.5106 (Nucleus)<br>0.4165 (Cytoplasm) |
| <i>TaHRZ1-D</i> | 10                     | TraesCS3D02G262600.1   | 139367.49                | 1237      | -0.335      | 5.58           | 0.4861 (Cytoplasm)<br>0.4131 (Nucleus) |
| <i>TaHRZ2-A</i> | 3                      | TraesCS1A02G374800.2   | 139639.19                | 1239      | -0.361      | 5.68           | 0.4743 (Nucleus)<br>0.3974 (Cytoplasm) |
| <i>TaHRZ2-B</i> | 1                      | TraesCS1B02G395000.1   | 139842.38                | 1241      | -0.372      | 5.66           | 0.5141 (Cytoplasm)<br>0.3408 (Nucleus) |
| <i>TaHRZ2-D</i> | 2                      | TraesCS1D02G382000.1   | 139925.45                | 1242      | -0.356      | 5.73           | 0.5111 (Cytoplasm)<br>0.3857 (Nucleus) |

**Supplementary Table 2** The orthologous IRO3/bHLH063/bHLH047/PYE and HRZ/BTS proteins included in phylogenetic analyses.

| <b>Orthologous protein</b> | <b>Gene ID or Location ID</b> | <b>Source</b>                  | <b>Length (aa)</b> |
|----------------------------|-------------------------------|--------------------------------|--------------------|
| OsIRO3                     | LOC_Os03g26210.1              | Rice Genome Annotation Project | 274                |
| HvIRO3                     | HORVU2Hr1G013450.14           | EnsemblPlants                  | 270                |
| ZmIRO3                     | Zm00001d029339                | EnsemblPlants                  | 270                |
| SbbHLH063                  | XP_021307582.1                | NCBI BLASTp                    | 271                |
| BpbHLH063                  | BRADI_1g61110v3               | EnsemblPlants                  | 263                |
| MabHLH063                  | XP_009386792.1                | NCBI BLASTp                    | 247                |
| AtPYE                      | AT3G47640.1                   | TAIR Arabidopsis               | 240                |
| PtbHLH047                  | POPTR_015G142700v3            | EnsemblPlants                  | 241                |
| StbHLH047                  | PGSC0003DMG400000599          | EnsemblPlants                  | 241                |
| SlbHLH047                  | Solyc03g116340.3.1            | EnsemblPlants                  | 241                |
| MtbHLH047                  | MTR_4g108360                  | EnsemblPlants                  | 246                |
| PvbHLH047                  | XP_007155319.1                | NCBI BLASTp                    | 218                |
| TpbHLH047                  | Tp57577_TGAC_v2_gene34729     | EnsemblPlants                  | 227                |
| OsHRZ1                     | LOC_Os01g49470                | Rice Genome Annotation Project | 1236               |
| OsHRZ2                     | LOC_Os05g47780                | Rice Genome Annotation Project | 812                |
| HvHRZ1                     | HORVU3Hr1G064080.2            | EnsemblPlants                  | 1234               |
| HvHRZ2                     | HORVU1Hr1G083240              | IPK BLAST Server               | 1226               |
| ZmHRZ1                     | Zm00001d043805_T001           | EnsemblPlants                  | 1233               |
| ZmHRZ2                     | Zm00001d038916_T001           | EnsemblPlants                  | 1205               |
| BdHRZ1                     | BRADI_2g46957v3               | EnsemblPlants                  | 1231               |
| BdHRZ2                     | BRADI_2g17507v3               | EnsemblPlants                  | 1234               |
| SbHRZ1                     | SORBI_3003G262200             | EnsemblPlants                  | 1272               |
| SbHRZ2                     | SORBI_3009G222200             | EnsemblPlants                  | 1215               |
| MaHRZ                      | GSMUA_Achr9G19220_001         | Banana Genome Hub              | 1288               |
| AtBTS                      | AT3G18290.1                   | TAIR Arabidopsis               | 1254               |
| PtBTS                      | POPTR_012G055100v3            | EnsemblPlants                  | 1240               |
| TpBTS                      | Tp57577_TGAC_v2_gene32705     | EnsemblPlants                  | 1236               |
| SIBTS                      | Solyc05g009150.3              | EnsemblPlants                  | 1064               |
| MtBTS                      | MTR_8g104410                  | EnsemblPlants                  | 1243               |
| PvBTS                      | PHAVU_002G317800g             | EnsemblPlants                  | 1236               |

**Supplementary Table 3** Primers used for quantitative reverse transcription-PCR analyses.

| <b>Gene</b>     | <b>Forward primer (5' – 3')</b> | <b>Reverse primer (5' – 3')</b> | <b>PCR product length (bp)</b> | <b>Annealing temperature (C°)</b> |
|-----------------|---------------------------------|---------------------------------|--------------------------------|-----------------------------------|
| <i>TaIRO3-A</i> | ACAGGCAGACCAATGGGAAG            | GCAGCTCATTCCTCTCCATC            | 147                            | 64                                |
| <i>TaIRO3-B</i> | TTTTCCCGTCACATCAGC              | GGTTCAAGGCCTTCGATGT             | 172                            | 60                                |
| <i>TaIRO3-D</i> | AGTTTTCCCGTCACAGCAG             | GCGCGTGATATGGTTGGT              | 211                            | 60                                |
| <i>TaHRZ1-A</i> | GCAAGTCTATCCGGGTTGC             | CACTCATTTAGCCACTCACCAA          | 259                            | 65                                |
| <i>TaHRZ1-B</i> | GCACAATGTGAGCCATTCATATAC        | TCGTAGCAAGCTCATTGTACTTC         | 203                            | 60                                |
| <i>TaHRZ1-D</i> | GTTCTTCCGTGGCTCTCAA             | TGTATGCTTTATATGCCCGACTT         | 268                            | 61                                |
| <i>TaHRZ2-A</i> | CCAGTCAAGCGAGGGAAAC             | TCTGGGCTGGAAAATGTCA             | 254                            | 60                                |
| <i>TaHRZ2-B</i> | TGGGTTACATCGGCACTTAG            | CTTCCAACCAGGCTTGAACAT           | 216                            | 61                                |
| <i>TaHRZ2-D</i> | CATATTGCTTGAGCTTTCACACTT        | TCAAACAGTGGCCACAACCTC           | 219                            | 65                                |
| <i>TaCyc</i>    | CAAGCCGCTGCACTACAAGG            | AGGGGACGGTGCAGATGAA             | 227                            | 60                                |
| <i>TaActin</i>  | GACAATGGAACCGGAATGGTC           | GTGTGATGCCAGATTTTCTCCAT         | 236                            | 60                                |
| <i>TaGAPDH</i>  | TTCAACATCATTTCCAAGCAGCA         | CGTAACCCAAAATGCCCTTG            | 220                            | 60                                |
| <i>TaEFA</i>    | CAGATTGGCAACGGCTACG             | CGGACAGCAAAACGACCAAG            | 227                            | 60                                |
